# Supplementary material for: Grassland management effect on ecosystem services in the livestock system in an oxisol from the Eastern high plains of Colombia
Source: Frontiers journal article supplement (doi:10.3389/fenvs.2023.1107466), 2023-08-11
Supplement: Table_1.DOCX [file Table_1.DOCX]

**Supplemental Material**

**Grassland management effect on ecosystems services in the livestock system in an oxisol from the Eastern highland plains of Colombia**

Nubia S. Rodríguez-Hernández1*†, Miguel Arango1, Lina M. Moreno-Conn1, José Orlando Arguello1, Jaime H. Bernal-Riobo1, Otoniel Pérez-López1†

1Colombian Agricultural Research Corporation - Agrosavia, La Libertad Research Center, Villavicencio, Meta 500008, Colombia.


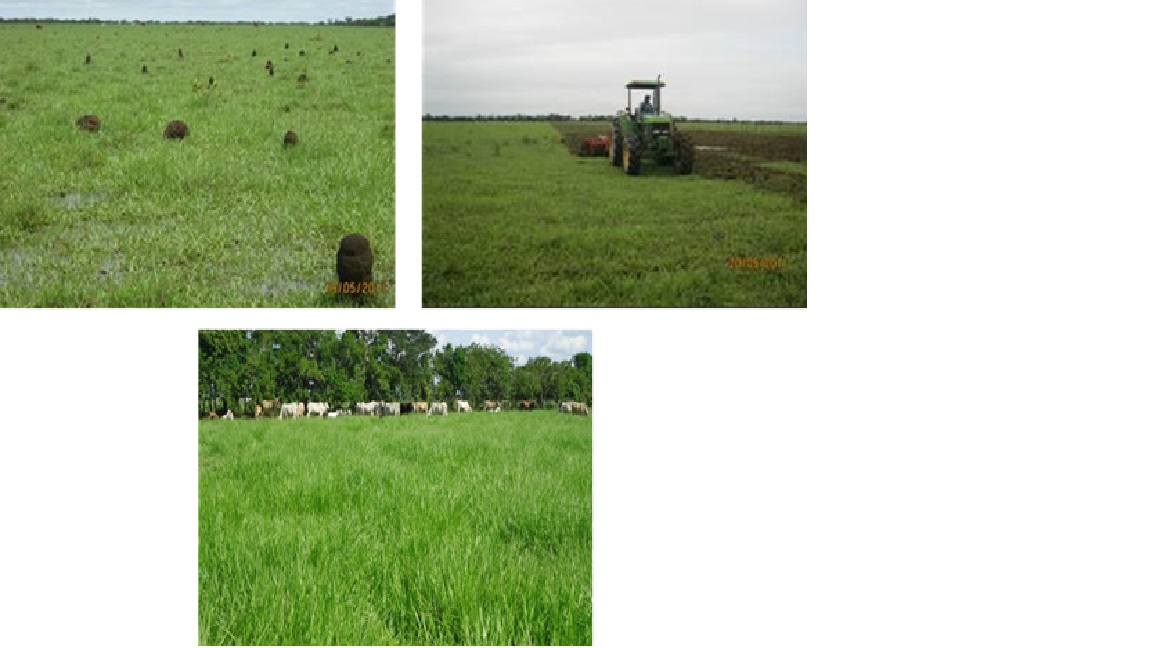


**Figure 1.** Panoramic view of grasslands before, during and after the intervention with recovery practices at CI Carimagua (Source: O. Pérez).


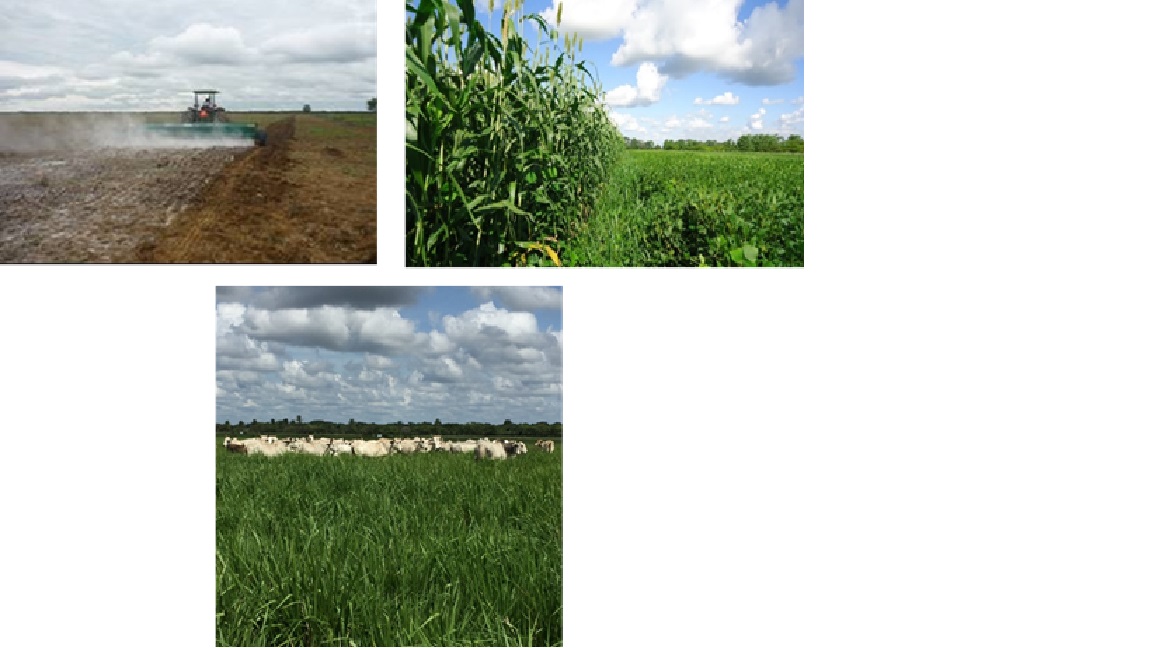


**Figure 2.** Production of sorghum-soybean crops for silage production and grassland renewal. CI Carimagua (Source: O. Perez)


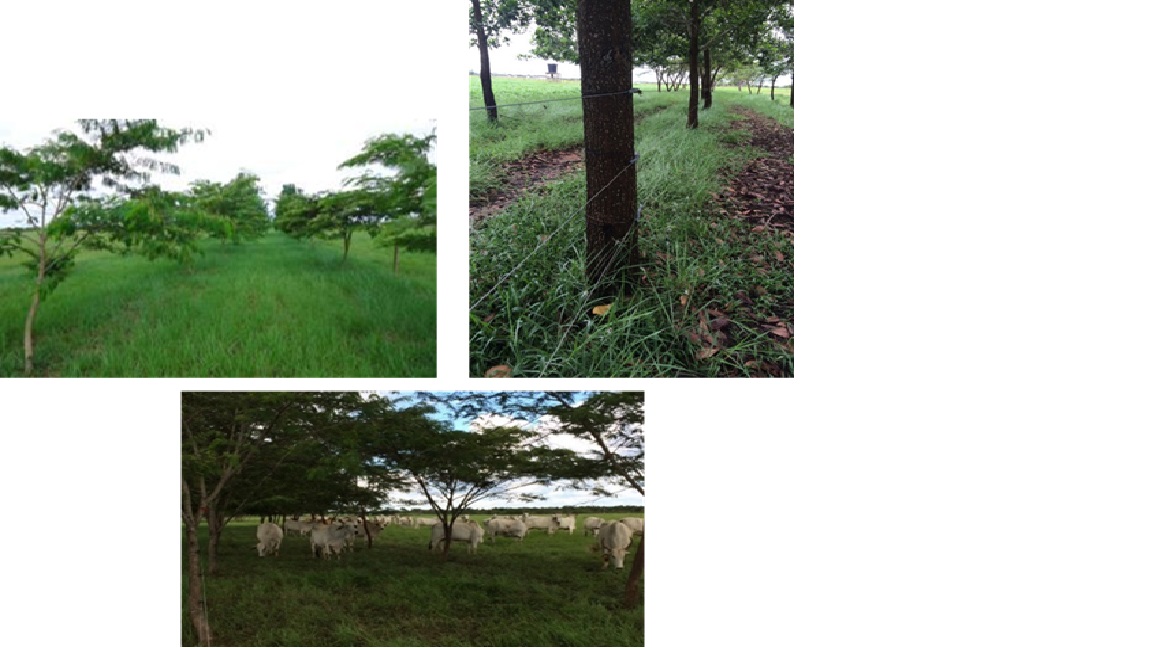


**Figure 3.** Silvopastoral arrangement in strips provides shade for animal comfort and the central groove of trees serves to support the electric fence (Source: O. Pérez).


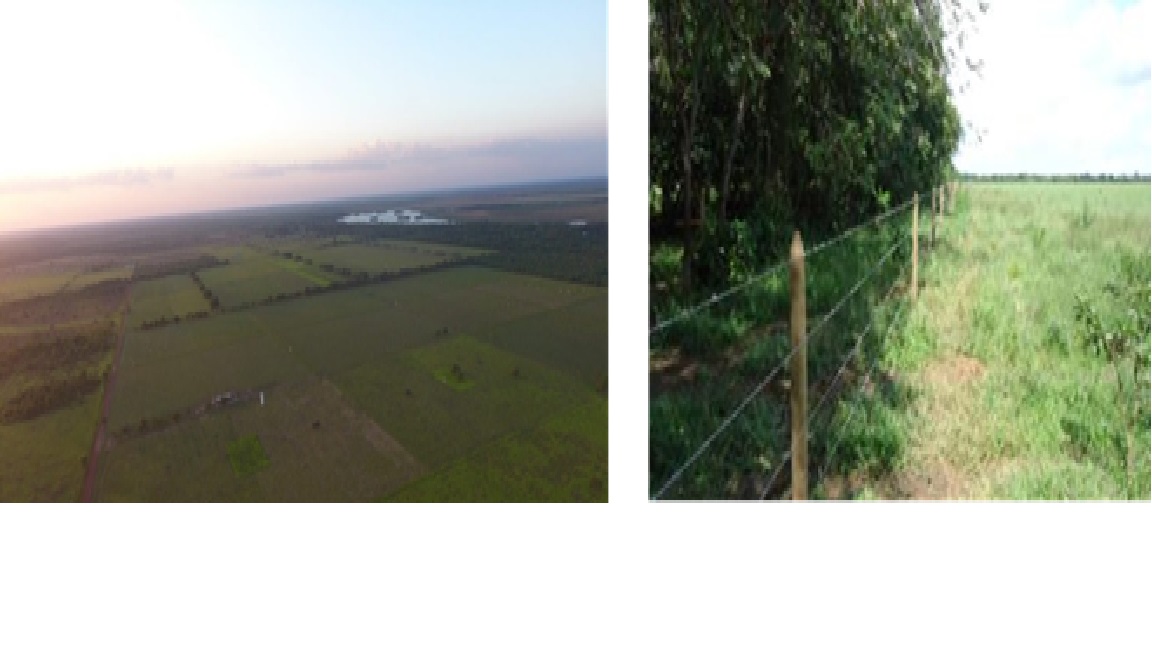


**Figure 4.** General view of the experiment showing the areas with protected forest relicts on the paddocks periphery (Source: R.A. Díaz, O. Pérez).
